# Supplementary material for: Stratigraphy and sedimentology of the Orakei maar lake sediment sequence (Auckland Volcanic Field, New Zealand)
Source: Copernicus journal article supplement (doi:10.5194/sd-25-47-2019), 2019-06-12
Supplement: Supplementary file 1 [file sd-25-47-2019-supplement.pdf]

Supplement of Sci. Dril., 25, 47–56, 2019  
<https://doi.org/10.5194/sd-25-47-2019-supplement>  
© Author(s) 2019. This work is distributed under  
the Creative Commons Attribution 4.0 License.

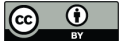

*Supplement of*

## **Stratigraphy and sedimentology of the Orakei maar lake sediment sequence (Auckland Volcanic Field, New Zealand)**

**Leonie Peti and Paul C. Augustinus**

*Correspondence to:* Leonie Peti (lpet986@aucklanduni.ac.nz)

The copyright of individual parts of the supplement might differ from the CC BY 4.0 License.

**Table S1: Summary of 16 lithostratigraphic units and 31 subunits in the Orakei maar sediment sequence.**

| Facies unit number | Abbreviated description                                                                                                        | Base (m; composite depth) | Base (m; event-corrected depth) | Basal contact |
|--------------------|--------------------------------------------------------------------------------------------------------------------------------|---------------------------|---------------------------------|---------------|
| 0                  | Marine/Estuarine Mud                                                                                                           | 0                         | 0                               | sharp         |
| 1a                 | Peat                                                                                                                           | 0.3                       | 0.3                             | gradual       |
| 1b                 | Beige (10YR 3/1 to 10YR 4/1) massive clay                                                                                      | 0.58                      | 0.58                            | sharp         |
| 1c                 | Peat                                                                                                                           | 1.38                      | 1.38                            | gradual       |
| 2a                 | Beige (10YR 3/1 to 10YR 4/1) massive clay                                                                                      | 1.74                      | 1.74                            | sharp         |
| 2b                 | Sand                                                                                                                           | 1.96                      | 1.96                            | sharp         |
| 2c                 | Light brown (10YR 3/2) massive clay with bioturbation                                                                          | 9.32                      | 9.30                            | sharp         |
| 3a                 | Finely banded sand (10YR 4/4) / silt (10YR 5/3)                                                                                | 10.08                     | 10.06                           | gradual       |
| 3b                 | Banded sand, disturbed, lots of organic remains                                                                                | 13.80                     | 13.78                           | gradual       |
| 3c                 | Fine light beige (10YR 4/4) sand bands in brown sand/silt (10YR 5/3), some larger organic remains                              | 16.93                     | 16.91                           | sharp         |
| 4                  | Light brown (10YR 4/3 to 10YR 5/3) clay, fine laminations (small colour change between laminations), some drilling disturbance | 26.60                     | 26.545                          | gradual       |
| 5                  | Brown, greyish (10YR 6/2 to 10YR 6/4) very fine clay with light wavy laminations                                               | 27.92                     | 27.865                          | sharp         |
| 6                  | Massive light brown clay (2.5Y 4/2) with basaltic tephra and disturbance                                                       | 29.24                     | 29.125                          | sharp         |
| 7                  | Reddish brown (10YR 3/4) clay with fine laminations and very abundant basaltic tephra                                          | 31.40                     | 30.84                           | sharp         |
| 8a                 | Dark brown (10YR 2/2 to 10YR 3/2) fine laminations (small colour contrast between laminations)                                 | 45.125                    | 44.393                          | sharp         |
| 8b                 | Dark brown (10YR 2/2 to 10YR 3/2) fine laminations (stronger colour contrast between laminations)                              | 50.94                     | 49.798                          | sharp         |
| 9a                 | Structureless dark silt (disturbed)                                                                                            | 51.17                     | 50.028                          | sharp         |
| 9b                 | Banded sand/silt (10YR 3/3)                                                                                                    | 55.71                     | 54.143                          | sharp         |
| 9c                 | Dominantly sand                                                                                                                | 56.45                     | 54.443                          | sharp         |
| 10                 | Fine brown (10YR 2/2) laminations, stronger colour contrast between laminations (darker), frequent (thin) turbidites           | 65.69                     | 63.363                          | sharp         |

|     |                                                                                                                                                                         |        |              |              |
|-----|-------------------------------------------------------------------------------------------------------------------------------------------------------------------------|--------|--------------|--------------|
| 11a | Silt with thin sand layers                                                                                                                                              | 67.86  | 65.533       | sharp        |
| 11b | Abundant sand layers/bands in silty matrix                                                                                                                              | 68.30  | 65.973       | sharp        |
| 11c | Coarse sand with big wood pieces                                                                                                                                        | 70.825 | 67.348       | sharp        |
| 11d | Thick sand bands in silty matrix, some wood                                                                                                                             | 73.485 | 69.618       | gradual      |
| 12a | Finely laminated clay with abundant silt and sand layers, some larger organics                                                                                          | 75.36  | 71.423       | sharp        |
| 12b | Finely laminated brown (10YR 2/2) clay with some turbidites and disturbance                                                                                             | 76.71  | 72.773       | sharp        |
| 13a | Very dark brown (10YR 3/4 to 10YR 2/2) clay with abundant turbidites, fine laminations                                                                                  | 77.86  | 73.763       | sharp        |
| 13b | Finely laminated very dark brown (10YR 3/4 to 10YR 2/2) clay, laminations in very high frequency and strong colour contrast, very abundant (sometimes thick) turbidites | 82.57  | 77.823       | sharp        |
| 14a | Massive light brown (10YR 5/3 to 10YR 5/4) clay and layered basaltic ash                                                                                                | 82.89  | 78.078       | sharp        |
| 14b | Massive light brown (10YR 5/3 to 10YR 5/4) clay (very fine)                                                                                                             | 84.075 | 79.243       | gradual      |
| 15  | Basaltic ash with some wood debris                                                                                                                                      | 86.34  | <sup>a</sup> | sharp        |
| 16  | Country rock, sandstone                                                                                                                                                 | 88.44  | <sup>a</sup> | base of core |

<sup>a</sup> Facies units 15 and 16 are entirely removed on the event corrected depth being the ejecta from the formative eruption (15) and underlying sandstone (16).

**Table S2: Overview of identified rhyolitic tephra layers in the Orakei sediment sequence identified in Peti et al. (under review) and AVF1 with published ages.**

| Tephra name | ECD (m) in Orakei sequence | Age (ka cal BP) | 1 standard deviation (ka) | Reference                                                                  |
|-------------|----------------------------|-----------------|---------------------------|----------------------------------------------------------------------------|
| Rotorua     | 5.23                       | 15.635          | 0.412                     | (Lowe et al., 2013)                                                        |
| Okareka     | 20.74                      | 21.858          | 0.290                     | (Lowe et al., 2013)                                                        |
| Maketu      | 40.37                      | 35.928          | 0.585                     | re-calibrated with SHCal13 (Hogg et al., 2013) after (Molloy et al., 2009) |
| Tahuna      | 41.988                     | 37.855          | 0.805                     | re-calibrated with SHCal13 (Hogg et al., 2013) after (Molloy et al., 2009) |
| Rotoehu     | 45.138                     | 45.1            | 1.650                     | (Danišik et al., 2012)                                                     |
| AVF1        | 60.043                     | 83.1            | ca. 1-2                   | (Molloy et al., 2009)                                                      |
| AVF1        | 60.043                     | 106.17          | 4.3                       | (Hopkins et al., 2017)                                                     |

## References

- Danišik, M., Shane, P., Schmitt, A.K., Hogg, A., Santos, G.M., Storm, S., Evans, N.J., Keith Fifield, L., Lindsay, J.M., 2012. Re-anchoring the late Pleistocene tephrochronology of New Zealand based on concordant radiocarbon ages and combined  $^{238}\text{U}/^{230}\text{Th}$  disequilibrium and (U-Th)/He zircon ages. *Earth and Planetary Science Letters* 349–350, 240–250. doi:10.1016/j.epsl.2012.06.041
- Hogg, A., Hua, Q., Blackwell, P.G., Niu, M., Buck, C.E., Guilderson, T.P., Heaton, T.J., Palmer, J.G., Reimer, P.J., Reimer, R.W., Turney, C.S.M., Zimmerman, S.R.H., 2013. SHCal13 Southern Hemisphere Calibration, 0–50,000 Years cal BP. *Radiocarbon* 55, 1889–1903. doi:10.2458/azu\_js\_rc.55.16783
- Hopkins, J.L., Wilson, C.J.N., Millet, M.A., Leonard, G.S., Timm, C., McGee, L.E., Smith, I.E.M., Smith, E.G.C., 2017. Multi-criteria correlation of tephra deposits to source centres applied in the Auckland Volcanic Field, New Zealand. *Bulletin of Volcanology* 79. doi:10.1007/s00445-017-1131-y
- Lowe, D.J., Blaauw, M., Hogg, A.G., Newnham, R.M., 2013. Ages of 24 widespread tephras erupted since 30,000 years ago in New Zealand, with re-evaluation of the timing and palaeoclimatic implications of the Lateglacial cool episode recorded at Kaipo bog. *Quaternary Science Reviews* 74, 170–194. doi:10.1016/j.quascirev.2012.11.022
- Molloy, C., Shane, P., Augustinus, P., 2009. Eruption recurrence rates in a basaltic volcanic field based on tephrallayers in maar sediments: Implications for hazards in the Auckland volcanic field. *Bulletin of the Geological Society of America* 121, 1666–1677. doi:10.1130/B26447.1
